# Supplementary material
Source: publisher site journal article supplement (https://www.dovepress.com/article/356134)
Supplement: Supplementary file 1 [file get_supplementary_file.php]

Appendix

**Interview guide**

**Section I: Consent form**

I want to thank you for taking the time to meet with me today. My name is ____________________________ and I would like to talk to you about your experiences of inventory management practice. We are going to identify challenges related to the inventory management practice of life-saving maternal, neonatal, and child health drugs to capture lessons that can be used for future interventions. The interview would take an average of 20 minutes. Please be sure to speak up so that we do not miss your comments. All responses will be kept confidential. This means that your interview responses will only be shared with research team members and we will ensure that any information we include in our report does not identify you as a participant. Remember, you do not have to talk about anything you do not want to and you may end the interview at any time. Do you have any questions about what I have just explained? Are you willing to participate in this interview? Yes ___ continue / No ___; If no, Stop!

Thank you very much!

Interviewee_____________________ Date__________________Place____________________age_________sex_______current position_____________

Years of experience (total___________ / current position_________________________)

remarks_____________________________________________________________________________________________________________________________________________________

**Section II: In-depth interview questions with probes**

1. Do you think that inventory management has a contribution to your health facility? Yes___/No___, if yes goes to Q2
2. Could you tell me about inventory management practices in your health facility? Would you add more about it?
3. How do you see your health facility applying practices of inventory management? Would you expand, please?
4. Are the data required to document inventory management activities at each level of the health facility as appropriate? Yes_______/No_______, if yes, can you elaborate on that idea?
5. What are the inventory recording and reporting issues of your health facility? Could you tell me more challenges your health facility faces?
6. Do you think that inventory recording and reporting issues are common to your facility? Yes___/No___, if yes, could you describe it, please?
7. Does your health facility get the requested amount of product based on the schedule determined by the IPLS? Are there any structural issues? Would you tell me more supply-related issues?
8. Do you think that the Ethiopian pharmaceutical supply agency is responsible to fill all orders from the lower-level health facilities? Yes____/No___, if yes, what complaints are reported to you by the lower-level health facilities? Please describe it?
9. What type of support do you have to the lower-level health care facilities? Would you have more ideas?
10. Does your health facility receive supportive feedback from the upper-level health care facilities? Can you elaborate on that idea?
11. Does your health facility have a sufficient number of skilled professionals? Would you add other staff-related issues? Would you suggest solutions?
12. What methods does your health facility use to keep and motivate the staff? Could you elaborate on it? Would you suggest solutions?
13. Is there anything more you would like to add?

Thank you for your support and time!
